# Supplementary material for: Determination of ferric ions using surface-enhanced Raman scattering based on desferrioxamine-functionalized silver nanoparticles
Source: Royal Society of Chemistry journal article supplement (doi:10.1039/c3cc43916j), 2013-01-01
Supplement: c3cc43916j.pdf [file c3cc43916j.pdf]

# Supplementary Material (ESI) for Chemical Communications  
# This journal is (c) The Royal Society of Chemistry 2013

## **Electronic Supplementary Information**

### **Determination of ferric ions by surface-enhanced Raman scattering based on desferrioxamine-functionalized silver nanoparticles**

**Fei Yan\*, Yam Shrestha and Charina L. Spurgeon**

**SEM characterization of silver nanoparticles.** To prepare the samples for scanning electron microscopy (SEM) studies, a drop of the silver metal colloids was placed on a piece of silicon wafer substrate (100 mm 500  $\mu\text{m}$  SSP MECH GRADE from University Wafer, Boston, MA) and dried over night at room temperature. The sample was then observed using a Nova NanoSEM 630 (FEI) field emission scanning electron microscope to assess the particle size and shape.

**Raman Measurements:** Raman spectra were obtained with a DeltaNu Advantage 200A (DeltaNu, Laramie, WY) equipped with a HeNe laser emitting at 633 nm. The laser power was 3 mW and the spectral resolution was  $10\text{ cm}^{-1}$ . Raman spectra were obtained in backscatter directly from an NMR glass tube (with an integration time of 1 s), and baseline-corrected using the software came with the system. Each sample was measured three times consecutively.

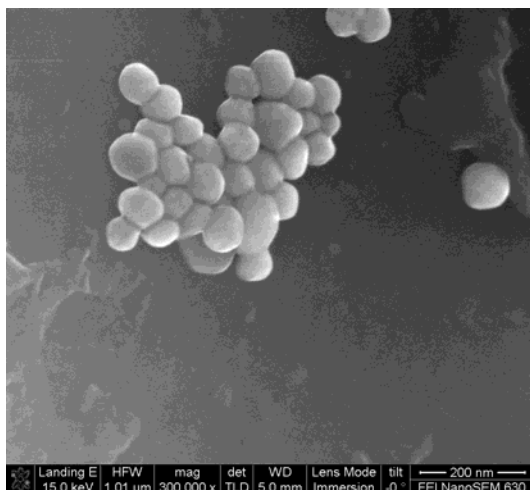

**Fig. 1S.** SEM image of Ag NPs prepared by reduction of silver nitrate with hydroxylamine hydrochloride at room temperature

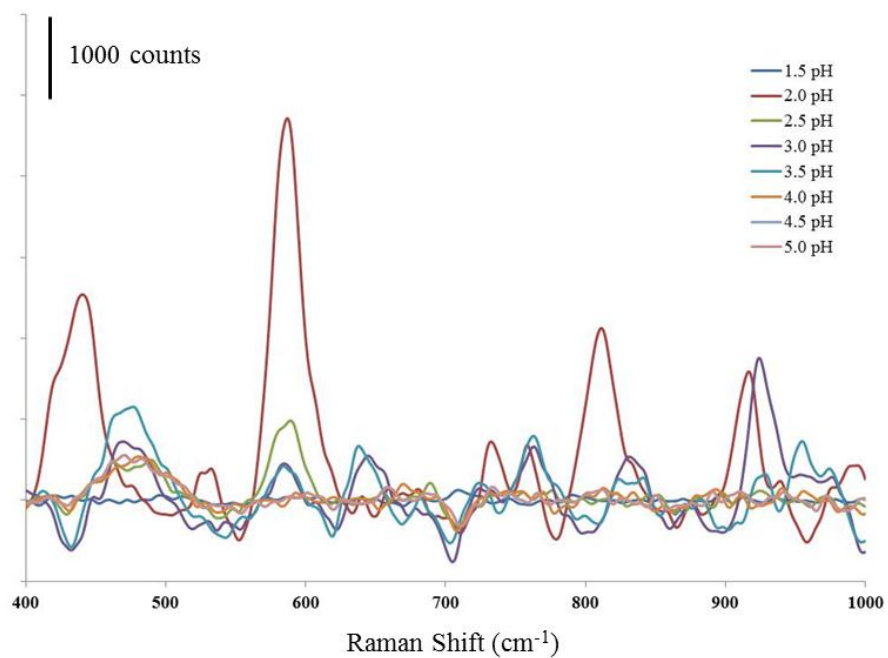

**Fig. 2S.** Raman spectra of DFB-Fe<sup>3+</sup> complex at different pHs. Each mixture consists of 600  $\mu\text{L}$  Ag NPs, 120  $\mu\text{L}$  DFB (1 mg/mL) and 120  $\mu\text{L}$  of Fe<sup>3+</sup> solutions (1 mM).
